# Supplementary material for: Pharmacokinetic and pharmacodynamic analysis of fulvestrant in preclinical models of breast cancer to assess the importance of its estrogen receptor-α degrader activity in antitumor efficacy
Source: PubMed Central journal article supplement (PMC6985185; doi:10.1007/s10549-019-05454-y), 2019-09-27
Supplement: 10549_2019_5454_MOESM1_ESM.pdf [file 10549_2019_5454_MOESM1_ESM.pdf]

A

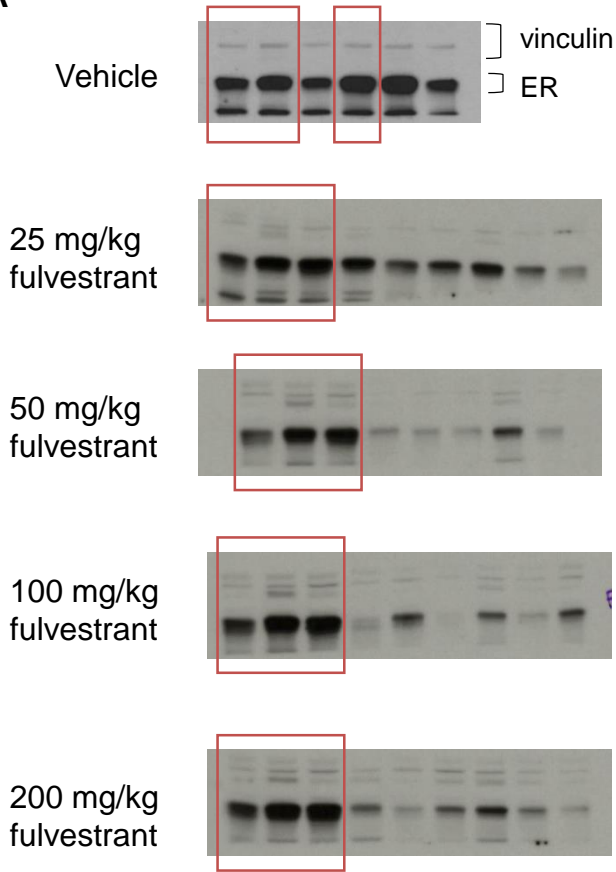

B

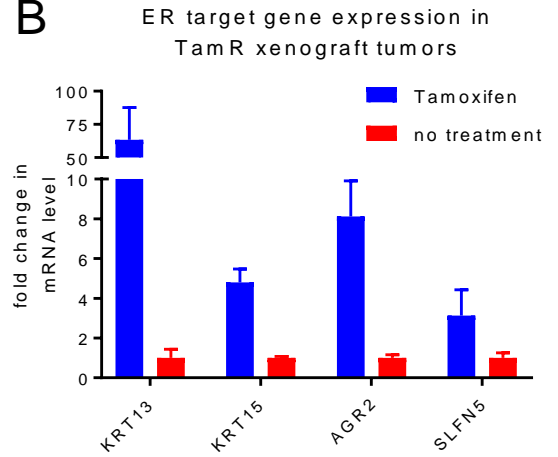

**A** TamR, study comparison

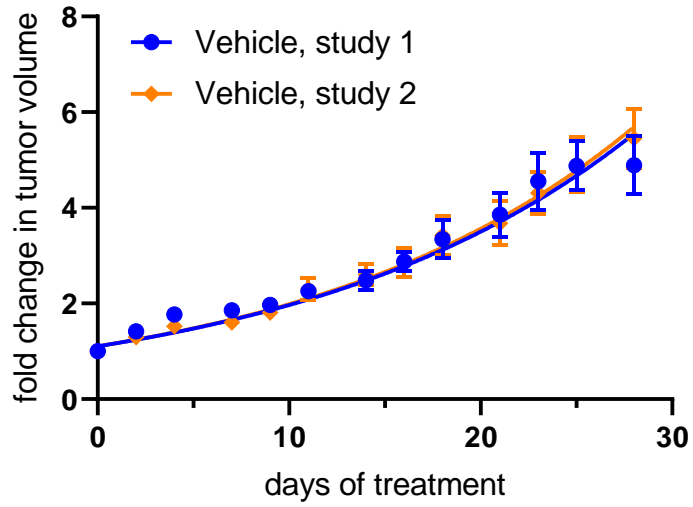

**B**

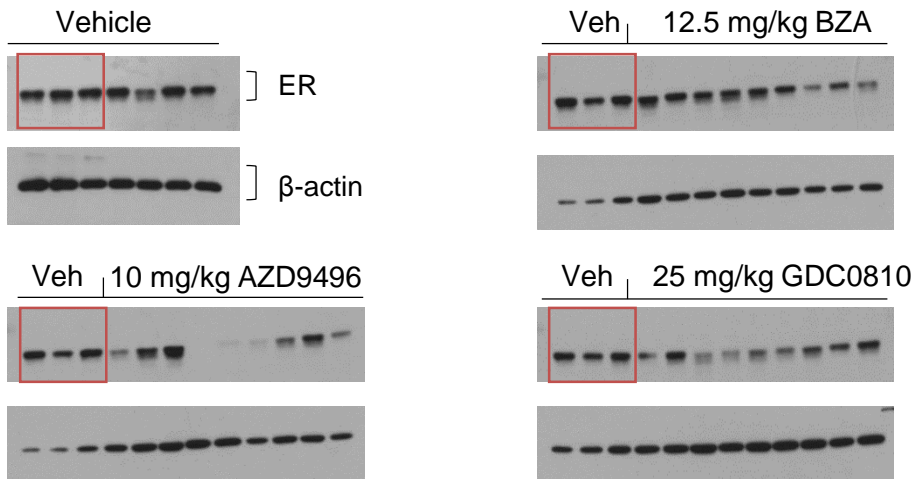

**A** Establishment of LTED *in vivo* model

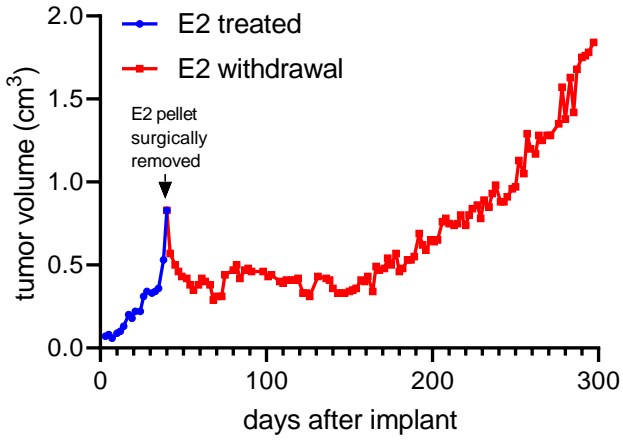

**B**

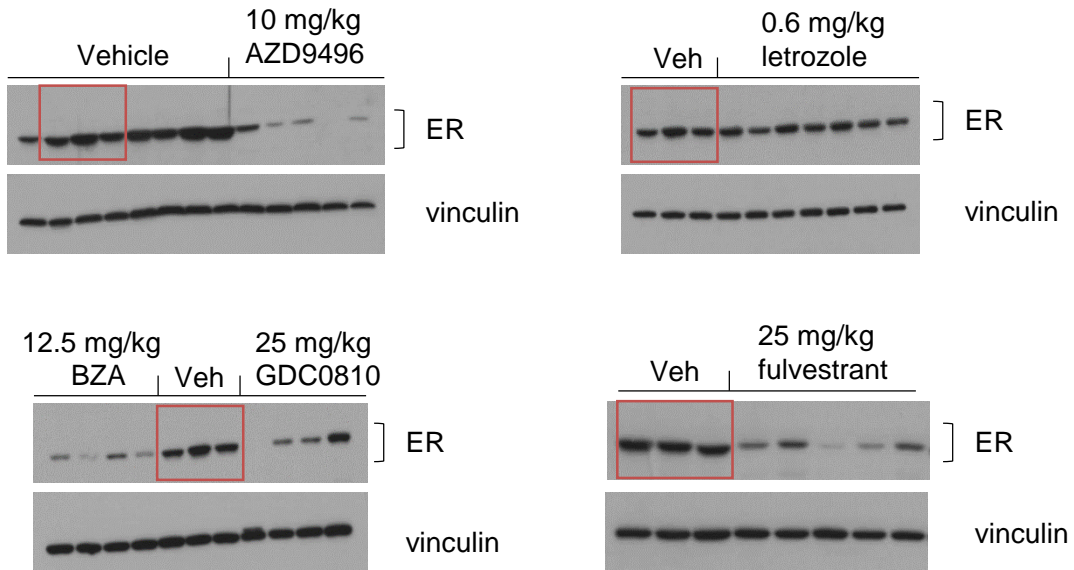

**C**

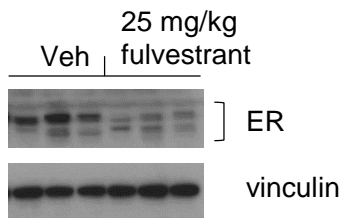

Wardell et al, captions for online resources

**Online Resource 1.** A) Tamoxifen treated *Nu:J* mice bearing TamR (tamoxifen resistant) xenograft tumors were randomized to treatment with vehicle or fulvestrant (25 – 200 mg/kg). ER levels present in tumors harvested from mice were analyzed by western blotting of tissue extracts to detect ER and vinculin. Indicated by red boxes are tumor extracts from the vehicle group that were included on all blots to enable normalization between blots. ER levels (normalized to vinculin) in treated tumors were calculated relative to the average normalized ER levels detected in the vehicle samples included in the same blot. B) RNA was isolated TamR tumors implanted in mice receiving tamoxifen treatment (5 mg/60 day implanted pellet) or no treatment. Expression of ER target genes, relative to housekeeping gene 36B4, was detected by real time quantitative PCR.

**Online Resource 2.** A) Average fold change in tumor relative to the initial volume at randomization is shown for the vehicle treatment groups only for both TamR xenograft studies presented in Figures 1 and 2. No significant difference was detected between these growth curves (2-way ANOVA followed by Bonferroni multiple comparison test). B) Intratumoral ER levels present in the TamR tumors harvested from mice enrolled in the treatment study presented in Figure 2 were analyzed by western blotting of tissue extracts to detect ER and vinculin. Indicated by red boxes are tumor extracts from the vehicle group that were included on all blots to enable normalization between blots. ER levels (normalized to  $\beta$ -actin) in treated tumors were calculated relative to the average normalized ER levels detected in the vehicle samples included in the same blot.

**Online Resource 3.** A) The LTED xenograft tumor model of resistance to estrogen deprivation was generated *in vivo* as illustrated. Estrogen treatment (0.72 mg/60 day implanted pellet) was withdrawn from an ovariectomized *Nu:J* mouse bearing an MCF7 xenograft tumor. After an initial 50% regression and approximate 3 months' stasis, the tumor resumed growth in an estrogen independent manner. These tumors can be subdivided and exhibit similar growth in ovariectomized and intact mice. B) Intratumoral ER levels present in the LTED tumors harvested from mice enrolled in the treatment study presented in Figure 3 were analyzed by western blotting of tissue extracts to detect ER and vinculin. Indicated by red boxes are tumor extracts from the vehicle group that were included on all blots to enable normalization between blots. ER levels (normalized to vinculin) in treated tumors were calculated relative to the average normalized ER levels detected in the vehicle samples included in the same blot. C) Intratumoral ER levels present in the HCC1428 tumors harvested from mice enrolled in the treatment study presented in Figure 4 were analyzed by western blotting of tissue extracts as described in (B).
